# Supplementary material
Source: publisher figshare collection journal article supplement (https://acs.figshare.com/ndownloader/files/4503004)
Supplement: Supplementary file 1 [file 4503004]

## Supplementary Materials

### Metabolic effects of dark chocolate consumption on energy, gut microbiota and stress-related metabolism in free-living subjects

Francois-Pierre J. Martin,<sup>†a</sup> Serge Rezzi,<sup>†a</sup> Emma Peré-Trepat,<sup>†</sup> Beate Kamlage,<sup>‡</sup> Sebastiano Collino,<sup>†</sup> Edgar Leibold,<sup>§</sup> Jürgen Kastler,<sup>‡</sup> Dietrich Rein,<sup>‡</sup> Laurent B. Fay,<sup>†</sup> Sunil Kochhar<sup>†\*</sup>

#### Supplementary Figure 1: Principal component analysis of biological matrices

PCA scores plots derived from <sup>1</sup>H NMR spectra (A) and MS data (B) of urine and from <sup>1</sup>H NMR CPMG spectra (C) and MS data (D) of plasma. Samples are labelled for each individual according to subject ID.

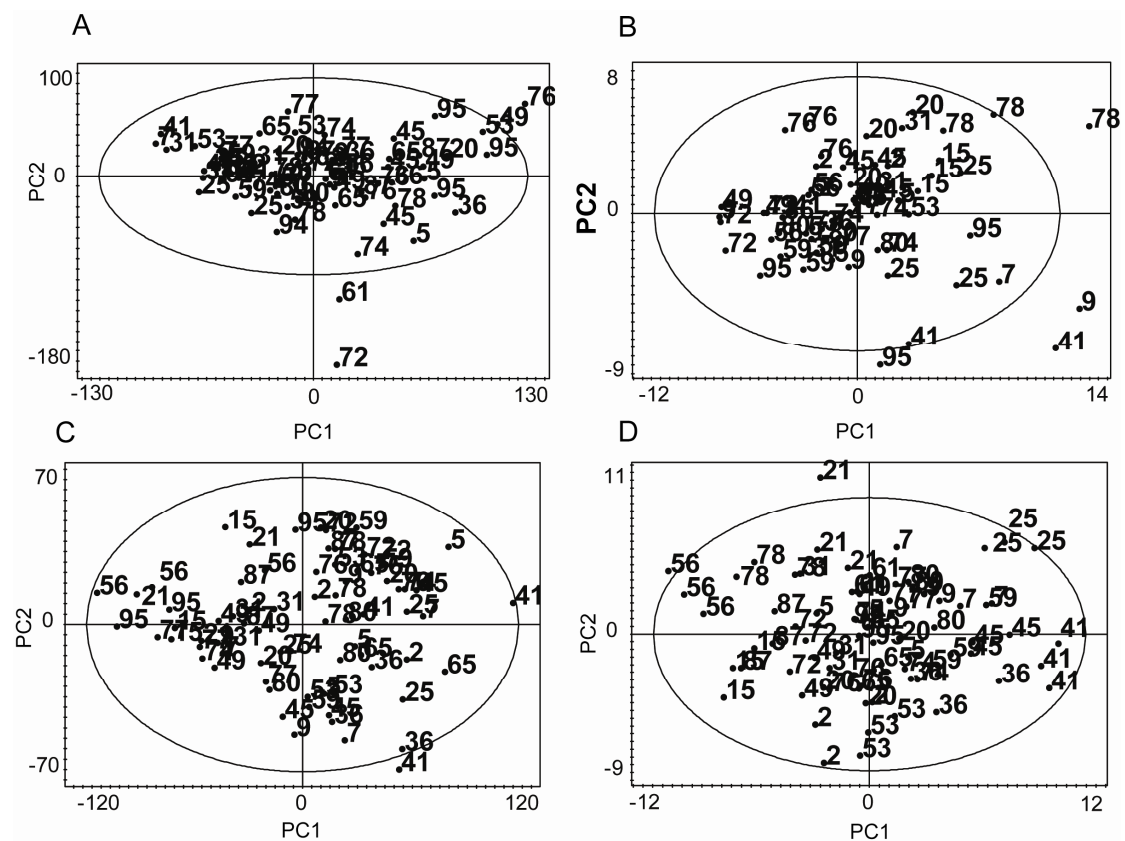

**Supplementary Table 1.** Summary of contrast test statistics to assess metabolic relationships between anxiety trait levels and chocolate consumption in urine and plasma

| Metabolites/p-values     | Measured by | Biofluids | Contrast (t1-t0)<br>High vs. Low<br>anxiety subjects | Contrast (t2-t0)<br>High vs. Low<br>anxiety subjects |
|--------------------------|-------------|-----------|------------------------------------------------------|------------------------------------------------------|
| <b>3-Methoxytyrosine</b> | MS          | Urine     | -                                                    | 0.02                                                 |
| <b>Acetate</b>           | NMR         | Plasma    | -                                                    | 0.02                                                 |
| <b>Aconitate</b>         | MS          | Urine     | -                                                    | -                                                    |
| <b>Adrenaline</b>        | MS          | Urine     | -                                                    | 0.01                                                 |
| <b>Choline</b>           | NMR         | Plasma    | -                                                    | -                                                    |
| <b>Citrate</b>           | NMR         | Urine     | -                                                    | 0.06                                                 |
| <b>DOPA</b>              | MS          | Urine     | 0.09                                                 | -                                                    |
| <b>Glutamate</b>         | NMR         | Plasma    | -                                                    | -                                                    |
| <b>Glycine</b>           | NMR         | Urine     | -                                                    | 0.02                                                 |
| <b>Glycine</b>           | MS          | Urine     | -                                                    | 0.01                                                 |
| <b>Hippurate</b>         | NMR         | Urine     | -                                                    | -                                                    |
| <b>Lycopene</b>          | MS          | Plasma    | -                                                    | -                                                    |
| <b>Methylsuccinate</b>   | NMR         | Urine     | -                                                    | -                                                    |
| <b>Normetanephrine</b>   | MS          | Plasma    | -                                                    | -                                                    |
| <b>p-Cresol sulfate</b>  | MS          | Urine     | -                                                    | -                                                    |
| <b>Proline</b>           | MS          | Urine     | -                                                    | -                                                    |
| <b>Trimethylamine</b>    | NMR         | Urine     | 0.06                                                 | -                                                    |
| <b>Trans-Aconitate</b>   | NMR         | Urine     | 0.01                                                 | 0.02                                                 |
| <b>β-alanine</b>         | MS          | Urine     | -                                                    | -                                                    |
| <b>β-Carotene</b>        | MS          | Plasma    | -                                                    | -                                                    |

**Key:** - designates difference not significant at 95% and 90% confidence level.
